# Supplementary material for: Cross-tissue eQTL enrichment of associations in schizophrenia
Source: PubMed Central journal article supplement (PMC6126834; doi:10.1371/journal.pone.0202812), 2018-09-06
Supplement: pone.0202812.s001.pdf [file pone.0202812.s001.pdf]

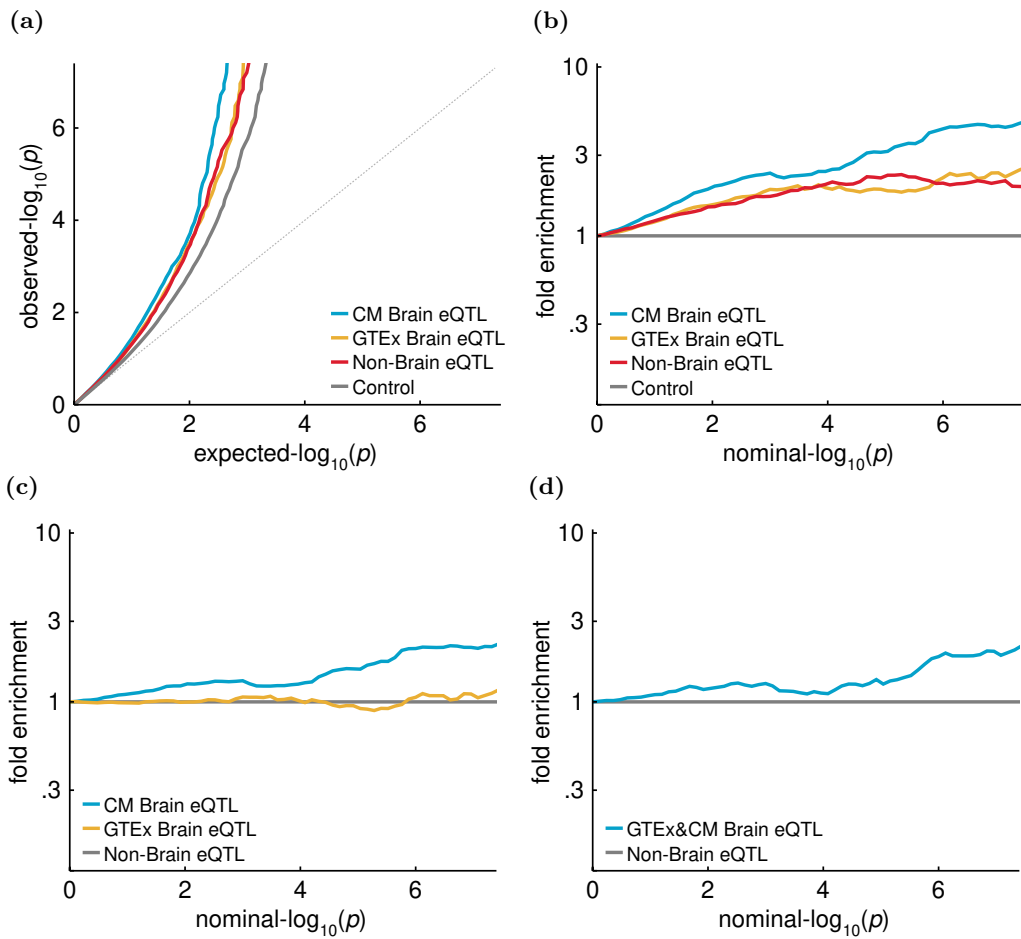

**S1 Fig Enrichment plots for CommonMind, GTEX, GTEX/CommonMind consensus brain and non-CNS eQTLs.** The top panels contain Q-Q and fold enrichment plots for the CommonMind, GTEX brain and TwinsUK non-CNS eQTLs. The bottom panels contain relative fold enrichment plots for CommonMind and GTEX and for GTEX/CommonMind consensus brain eQTLs compared to non-CNS eQTL variants.
