# Supplementary material for: Cross-tissue eQTL enrichment of associations in schizophrenia
Source: PubMed Central journal article supplement (PMC6126834; doi:10.1371/journal.pone.0202812), 2018-09-06
Supplement: pone.0202812.s002.pdf [file pone.0202812.s002.pdf]

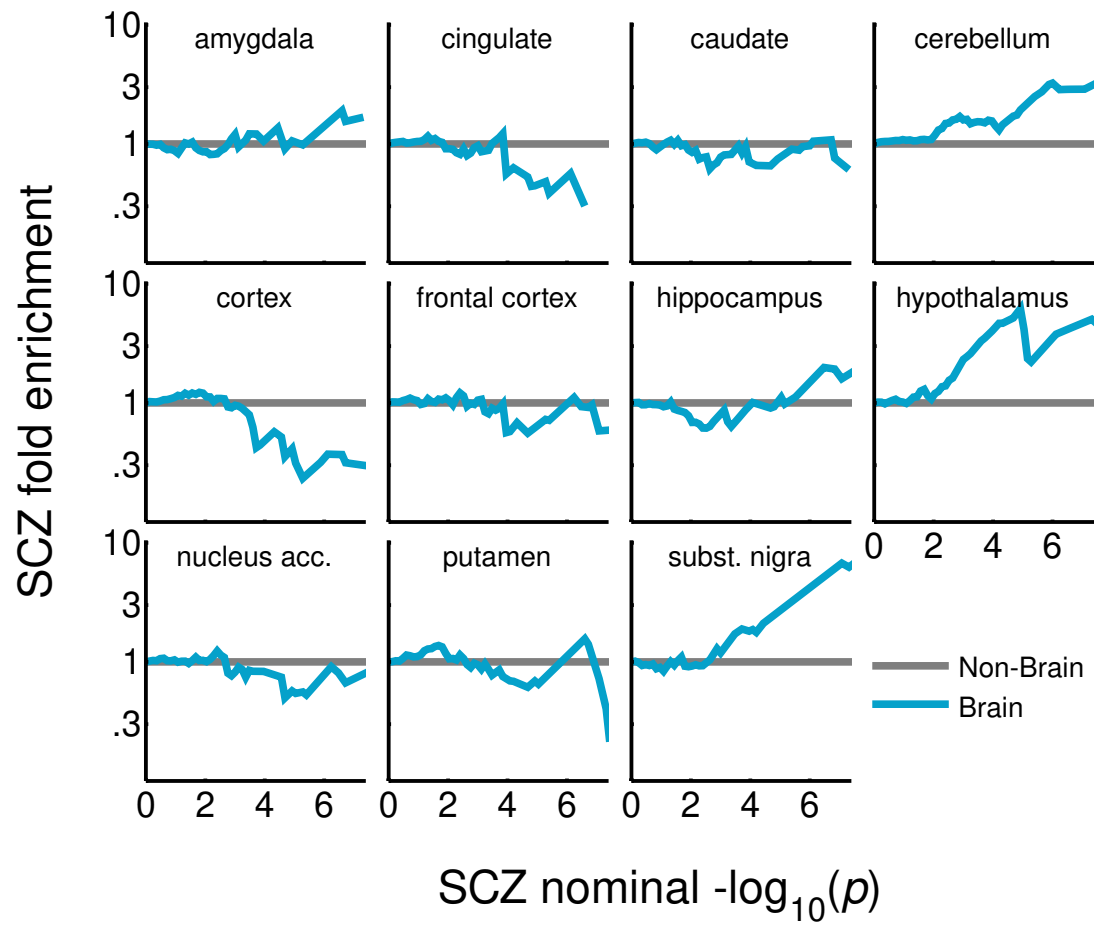

**S2 Fig** Enrichment plots for GTEx/CommonMind consensus region-specific brain eQTLs. The fold enrichment is relative to non-CNS eQTL variants.
