# Supplementary material for: Cross-tissue eQTL enrichment of associations in schizophrenia
Source: PubMed Central journal article supplement (PMC6126834; doi:10.1371/journal.pone.0202812), 2018-09-06
Supplement: pone.0202812.s003.pdf [file pone.0202812.s003.pdf]

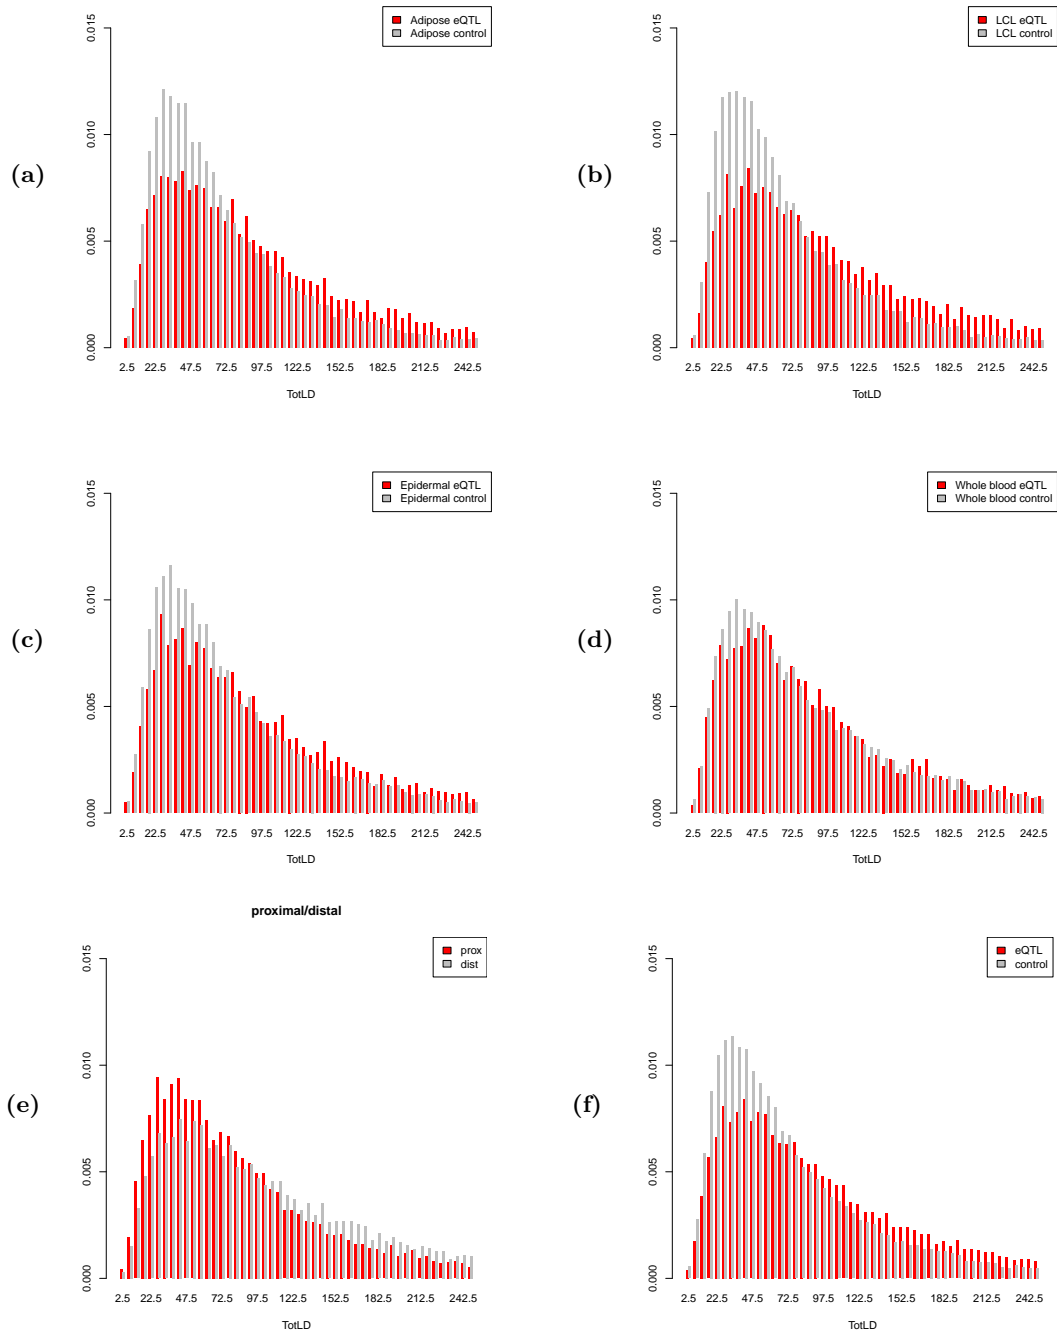

**S3 Fig Histograms of total LD.** Total LD-tagging power of eQTLs and control SNPs, and proximal (prox) and distal (dist) eQTLs.
