# Supplementary material for: Cross-tissue eQTL enrichment of associations in schizophrenia
Source: PubMed Central journal article supplement (PMC6126834; doi:10.1371/journal.pone.0202812), 2018-09-06
Supplement: pone.0202812.s004.pdf [file pone.0202812.s004.pdf]

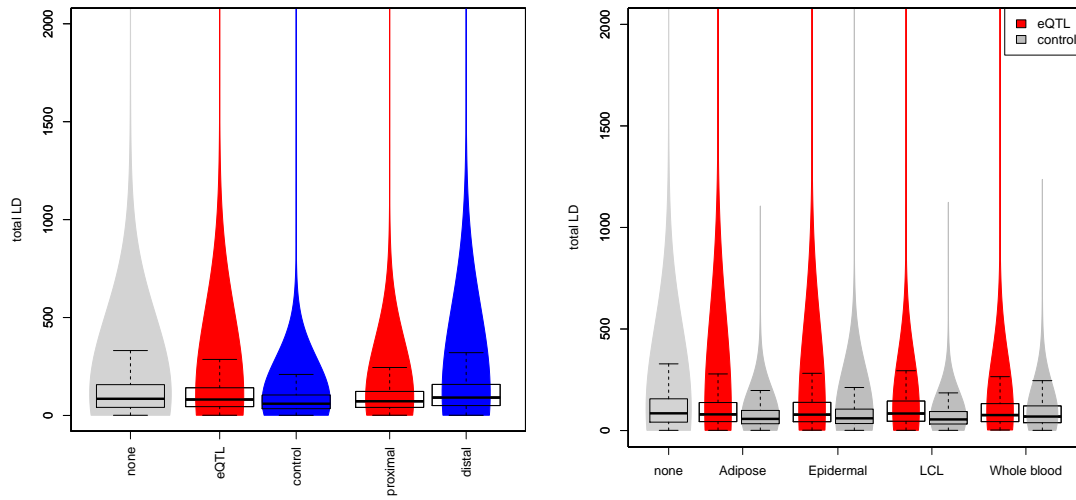

(a)

(b)

**S4 Fig Total LD for different eQTL types and control variants in the study.** Box plots are overlaid on kernel density plots [1].

1. Hintze JL, Nelson RD. Violin plots: a box plot-density trace synergism. *The American Statistician*. 1998;52(2):181–184.
