# Supplementary material for: Cross-tissue eQTL enrichment of associations in schizophrenia
Source: PubMed Central journal article supplement (PMC6126834; doi:10.1371/journal.pone.0202812), 2018-09-06
Supplement: pone.0202812.s010.pdf [file pone.0202812.s010.pdf]

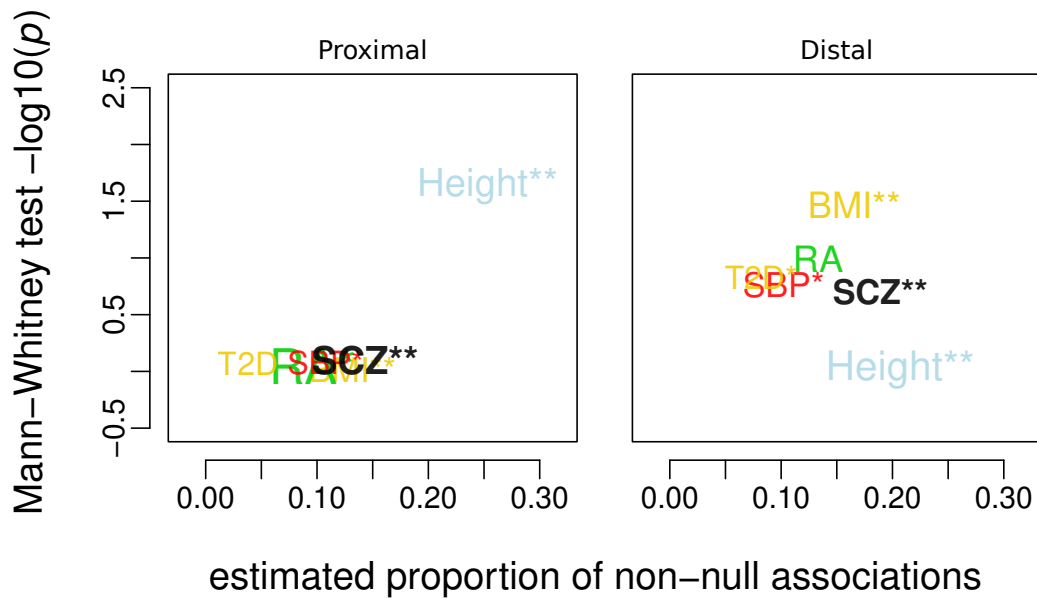

**S10 Fig** Differences (Mann-Whitney test p-values) in association p-values between proximal and distal eQTLs as functions of the estimated proportions of non-null associations. The GWAS names or acronyms are color-coded to represent different categories (azure=anthropometric, [height]; red=cardiovascular, systolic blood pressure [SBP]; green=immune, rheumatoid arthritis [RA]; gold=metabolic, body mass index [BMI], type-II diabetes [T2D]; black=schizophrenia) and their sizes are proportional to the respective ANCOVA coefficients (\*  $p < 0.05$ , \*\*  $p < 0.001$ ).
