# Supplementary material for: Cross-tissue eQTL enrichment of associations in schizophrenia
Source: PubMed Central journal article supplement (PMC6126834; doi:10.1371/journal.pone.0202812), 2018-09-06
Supplement: pone.0202812.s012.pdf [file pone.0202812.s012.pdf]

**S1 Table Schizophrenia association chi-squared general linear model coefficients for GTE<sub>x</sub> brain and GTE<sub>x</sub>/CommonMind consensus brain eQTLs compared to non-CNS eQTLs.** The test statistics refer to a general linear model of all brain and non-CNS variants in the ~9 million variant template. The  $\pi_1$  are therefore overestimated and do not represent genome-wide values.

| eQTL (n)          |                             | $\beta$ | $\beta$ (low 95%) | $\beta$ (high 95%) | $p$      | $\pi_1$ | $p_{MW}$ |
|-------------------|-----------------------------|---------|-------------------|--------------------|----------|---------|----------|
| Amygdala          | GTE <sub>x</sub> (1046)     | -0.059  | -0.18             | 0.056              | 0.37     | 0.26    | 0.83     |
|                   | GTE <sub>x</sub> &CM (591)  | -0.048  | -0.20             | 0.10               | 0.57     | 0.20    | 0.56     |
| Cingulate         | GTE <sub>x</sub> (1976)     | -0.039  | -0.12             | 0.046              | 0.42     | 0.38    | 0.68     |
|                   | GTE <sub>x</sub> &CM (1055) | -0.025  | -0.14             | 0.088              | 0.70     | 0.37    | 0.14     |
| Caudate           | GTE <sub>x</sub> (2861)     | -0.056  | -0.13             | 0.015              | 0.16     | 0.23    | 0.96     |
|                   | GTE <sub>x</sub> &CM (1280) | -0.018  | -0.12             | 0.085              | 0.76     | 0.30    | 0.12     |
| Cerebellum        | GTE <sub>x</sub> (4848)     | 0.028   | -0.028            | 0.083              | 0.38     | 0.26    | 0.27     |
|                   | GTE <sub>x</sub> &CM (1827) | 0.063   | -0.023            | 0.15               | 0.20     | 0.31    | 0.0017   |
| Cortex            | GTE <sub>x</sub> (3162)     | -0.059  | -0.13             | 0.009              | 0.13     | 0.33    | 0.92     |
|                   | GTE <sub>x</sub> &CM (1620) | -0.024  | -0.12             | 0.067              | 0.64     | 0.37    | 0.13     |
| Frontal Cortex    | GTE <sub>x</sub> (2454)     | -0.026  | -0.10             | 0.05               | 0.55     | 0.30    | 0.93     |
|                   | GTE <sub>x</sub> &CM (1249) | 0.031   | -0.073            | 0.13               | 0.60     | 0.33    | 0.11     |
| Hippocampus       | GTE <sub>x</sub> (1547)     | 0.027   | -0.068            | 0.12               | 0.61     | 0.15    | 0.93     |
|                   | GTE <sub>x</sub> &CM (843)  | 0.083   | -0.043            | 0.21               | 0.25     | 0.22    | 0.29     |
| Hypothalamus      | GTE <sub>x</sub> (1492)     | -0.04   | -0.14             | 0.057              | 0.47     | 0.24    | 0.95     |
|                   | GTE <sub>x</sub> &CM (814)  | 0.036   | -0.092            | 0.16               | 0.62     | 0.21    | 0.77     |
| Nucleus accumbens | GTE <sub>x</sub> (2436)     | -0.021  | -0.098            | 0.056              | 0.63     | 0.32    | 0.62     |
|                   | GTE <sub>x</sub> &CM (1155) | -0.026  | -0.13             | 0.082              | 0.68     | 0.32    | 0.098    |
| Putamen           | GTE <sub>x</sub> (2022)     | -0.045  | -0.13             | 0.038              | 0.34     | 0.27    | 0.89     |
|                   | GTE <sub>x</sub> &CM (993)  | 0.0031  | -0.11             | 0.12               | 0.96     | 0.33    | 0.13     |
| Substantia nigra  | GTE <sub>x</sub> (825)      | -0.082  | -0.21             | 0.048              | 0.27     | 0.19    | 0.96     |
|                   | GTE <sub>x</sub> &CM (478)  | -0.057  | -0.22             | 0.11               | 0.55     | 0.22    | 0.75     |
| All               | GTE <sub>x</sub> (20659)    | 0.013   | -0.0069           | 0.034              | 0.19     | 0.26    | 0.96     |
|                   | GTE <sub>x</sub> &CM (8992) | 0.094   | 0.067             | 0.12               | 7.73E-12 | 0.30    | 0.00012  |
