# Supplementary material for: Cross-tissue eQTL enrichment of associations in schizophrenia
Source: PubMed Central journal article supplement (PMC6126834; doi:10.1371/journal.pone.0202812), 2018-09-06
Supplement: pone.0202812.s013.pdf [file pone.0202812.s013.pdf]

**S2 Table Schizophrenia association chi-squared differences between various eQTL types and matching control variants.**

| Adipose tissue eQTLs VS control                               |          |            |         |              |
|---------------------------------------------------------------|----------|------------|---------|--------------|
|                                                               | Estimate | Std. Error | t value | Pr(> t )     |
| Adipose eQTL                                                  | 0.44     | 0.037      | 11.73   | <2e-16 ***   |
| control Adipose eQTL                                          | -0.0079  | 0.021      | -0.37   | 0.71         |
| —                                                             |          |            |         |              |
| F-statistic: 68.85 on 2 and 2540800 DF, p-value: < 2.2e-16    |          |            |         |              |
| Wilcoxon rank sum test: W = 22520000, p-value = 1.606e-11     |          |            |         |              |
| Epidermal tissue eQTLs VS control                             |          |            |         |              |
|                                                               | Estimate | Std. Error | t value | Pr(> t )     |
| Epidermal eQTL                                                | 0.41     | 0.04       | 10.27   | <2e-16 ***   |
| control Epidermal eQTL                                        | 0.011    | 0.021      | 0.52    | 0.61         |
| —                                                             |          |            |         |              |
| F-statistic: 52.87 on 2 and 2540800 DF, p-value: < 2.2e-16    |          |            |         |              |
| Wilcoxon rank sum test: W = 20528000, p-value = 4.364e-06     |          |            |         |              |
| LCL eQTLs VS control                                          |          |            |         |              |
|                                                               | Estimate | Std. Error | t value | Pr(> t )     |
| LCL eQTL                                                      | 0.53     | 0.035      | 15.15   | < 2e-16 ***  |
| control LCL eQTL                                              | -0.065   | 0.023      | -2.90   | 0.00374 **   |
| —                                                             |          |            |         |              |
| F-statistic: 119.1 on 2 and 2540800 DF, p-value: < 2.2e-16    |          |            |         |              |
| Wilcoxon rank sum test: W = 22572000, p-value = 1.039e-10     |          |            |         |              |
| Whole blood eQTLs VS control                                  |          |            |         |              |
|                                                               | Estimate | Std. Error | t value | Pr(> t )     |
| Whole blood eQTL                                              | 0.49     | 0.046      | 10.49   | < 2e-16 ***  |
| control Whole blood eQTL                                      | 0.13     | 0.024      | 5.697   | 1.22e-08 *** |
| —                                                             |          |            |         |              |
| F-statistic: 71.18 on 2 and 2540800 DF, p-value: < 2.2e-16    |          |            |         |              |
| Wilcoxon rank sum test: W = 11602000, p-value = 0.005409      |          |            |         |              |
| proximal eQTLs VS distal eQTLs                                |          |            |         |              |
|                                                               | Estimate | Std. Error | t value | Pr(> t )     |
| eQTL (prox)                                                   | 0.49     | 0.029      | 17.24   | <2e-16 ***   |
| eQTL (dist)                                                   | 0.46     | 0.026      | 17.32   | <2e-16 ***   |
| —                                                             |          |            |         |              |
| F-statistic: 297.9 on 2 and 2540800 DF, p-value: < 2.2e-16    |          |            |         |              |
| Wilcoxon rank sum test: W = 23019000, p-value = 0.3818        |          |            |         |              |
| promoter eQTLs VS non-promoter eQTLs                          |          |            |         |              |
|                                                               | Estimate | Std. Error | t value | Pr(> t )     |
| eQTL (prom)                                                   | 0.65     | 0.065      | 10.01   | <2e-16 ***   |
| eQTL (non-prom)                                               | 0.45     | 0.02       | 22.08   | <2e-16 ***   |
| —                                                             |          |            |         |              |
| F-statistic: 293.5 on 2 and 2540800 DF, p-value: < 2.2e-16    |          |            |         |              |
| Wilcoxon rank sum test: W = 7765100, p-value = 0.03385        |          |            |         |              |
| eQTLs VS control                                              |          |            |         |              |
|                                                               | Estimate | Std. Error | t value | Pr(> t )     |
| eQTL                                                          | 0.47     | 0.02       | 24.06   | <2e-16 ***   |
| control eQTL                                                  | 0.018    | 0.011      | 1.60    | 0.11         |
| —                                                             |          |            |         |              |
| F-statistic: 290.5 on 2 and 2540800 DF, p-value: < 2.2e-16    |          |            |         |              |
| Wilcoxon rank sum test: W = 288200000, p-value < 2.2e-16      |          |            |         |              |
| Signif. codes: 0 '***' 0.001 '**' 0.01 '*' 0.05 '.' 0.1 ' ' 1 |          |            |         |              |
