# Supplementary material for: Cross-tissue eQTL enrichment of associations in schizophrenia
Source: PubMed Central journal article supplement (PMC6126834; doi:10.1371/journal.pone.0202812), 2018-09-06
Supplement: pone.0202812.s014.pdf [file pone.0202812.s014.pdf]

**S3 Table** Total LD differences between various eQTL types and matching control variants.

| Adipose tissue eQTLs VS control                                                                                        |          |            |         |              |
|------------------------------------------------------------------------------------------------------------------------|----------|------------|---------|--------------|
|                                                                                                                        | Estimate | Std. Error | t value | Pr(> t )     |
| Adipose eQTL                                                                                                           | 5.09     | 1.82       | 2.80    | 0.00514 **   |
| control Adipose eQTL                                                                                                   | -24.48   | 1.04       | -23.54  | < 2e-16 ***  |
| F-statistic: 281.1 on 2 and 2558408 DF, p-value: < 2.2e-16<br>Wilcoxon rank sum test: W = 26135000, p-value < 2.2e-16  |          |            |         |              |
| Epidermal tissue eQTLs VS control                                                                                      |          |            |         |              |
|                                                                                                                        | Estimate | Std. Error | t value | Pr(> t )     |
| Epidermal eQTL                                                                                                         | 6.06     | 1.92       | 3.15    | 0.00161 **   |
| control Epidermal eQTL                                                                                                 | -20.79   | 1.02       | -20.37  | < 2e-16 ***  |
| F-statistic: 212.7 on 2 and 2558408 DF, p-value: < 2.2e-16<br>Wilcoxon rank sum test: W = 23586000, p-value < 2.2e-16  |          |            |         |              |
| LCL eQTLs VS control                                                                                                   |          |            |         |              |
|                                                                                                                        | Estimate | Std. Error | t value | Pr(> t )     |
| LCL eQTL                                                                                                               | 11.08    | 1.71       | 6.46    | 1.03e-10 *** |
| control LCL eQTL                                                                                                       | -27.44   | 1.10       | -24.95  | < 2e-16 ***  |
| F-statistic: 332.4 on 2 and 2558408 DF, p-value: < 2.2e-16<br>Wilcoxon rank sum test: W = 27662000, p-value < 2.2e-16  |          |            |         |              |
| Whole blood eQTLs VS control                                                                                           |          |            |         |              |
|                                                                                                                        | Estimate | Std. Error | t value | Pr(> t )     |
| Whole blood eQTL                                                                                                       | 1.90     | 2.26       | 0.84    | 0.40         |
| control Whole blood eQTL                                                                                               | -10.04   | 1.15       | -8.74   | <2e-16 ***   |
| F-statistic: 38.6 on 2 and 2558408 DF, p-value: < 2.2e-16<br>Wilcoxon rank sum test: W = 12108000, p-value = 4.323e-09 |          |            |         |              |
| proximal eQTLs VS distal eQTLs                                                                                         |          |            |         |              |
|                                                                                                                        | Estimate | Std. Error | t value | Pr(> t )     |
| eQTL (prox)                                                                                                            | -6.59    | 1.39       | -4.73   | 2.25e-06 *** |
| eQTL (dist)                                                                                                            | 17.90    | 1.29       | 13.92   | < 2e-16 ***  |
| F-statistic: 108.2 on 2 and 2558408 DF, p-value: < 2.2e-16<br>Wilcoxon rank sum test: W = 19919000, p-value < 2.2e-16  |          |            |         |              |
| promoter eQTLs VS non-promoter eQTLs                                                                                   |          |            |         |              |
|                                                                                                                        | Estimate | Std. Error | t value | Pr(> t )     |
| eQTL (prom)                                                                                                            | -0.59    | 3.16       | -0.18   | 0.85         |
| eQTL (non-prom)                                                                                                        | 7.44     | 1.00       | 7.46    | 8.3e-14 ***  |
| F-statistic: 27.89 on 2 and 2558408 DF, p-value: 7.752e-13<br>Wilcoxon rank sum test: W = 7241200, p-value = 0.004889  |          |            |         |              |
| eQTLs VS control                                                                                                       |          |            |         |              |
|                                                                                                                        | Estimate | Std. Error | t value | Pr(> t )     |
| eQTL                                                                                                                   | 6.40     | 0.95       | 6.73    | 1.74e-11 *** |
| control eQTL                                                                                                           | -20.43   | 0.56       | -36.70  | < 2e-16 ***  |
| F-statistic: 698.3 on 2 and 2558408 DF, p-value: < 2.2e-16<br>Wilcoxon rank sum test: W = 329700000, p-value < 2.2e-16 |          |            |         |              |

Signif. codes: 0 '\*\*\*' 0.001 '\*\*' 0.01 '\*' 0.05 '.' 0.1 ' ' 1
