# Supplementary material for: Cross-tissue eQTL enrichment of associations in schizophrenia
Source: PubMed Central journal article supplement (PMC6126834; doi:10.1371/journal.pone.0202812), 2018-09-06
Supplement: pone.0202812.s015.pdf [file pone.0202812.s015.pdf]

**S4 Table** Enrichment statistics and general linear model coefficients for squared schizophrenia association z-scores differences between adipose tissue, epidermal tissue, lymphoblastoid cell lines (LCL) and whole blood eQTLs, and matching control variants. All eQTLs designated by CommonMind or GTEx as brain eQTLs were excluded from these analyses.

| annotation  |         | $\bar{\beta}$ | $\beta$ (low 95%) | $\beta$ (high 95%) | $p$      | $\pi_1$ | $p_{MW}$ |
|-------------|---------|---------------|-------------------|--------------------|----------|---------|----------|
| Adipose     | eQTL    | 0.12          | 0.043             | 0.20               | 0.0025   | 0.22    |          |
|             | control | -0.08         | -0.12             | -0.039             | 0.00013  | 0.07    | 5.98E-07 |
| Epidermal   | eQTL    | 0.099         | 0.023             | 0.18               | 0.011    | 0.22    |          |
|             | control | -0.076        | -0.12             | -0.031             | 0.0011   | 0.076   | 0.00027  |
| LCL         | eQTL    | 0.12          | 0.053             | 0.19               | 0.00058  | 0.12    |          |
|             | control | -0.092        | -0.13             | -0.051             | 1.16E-05 | 0.082   | 1.53E-05 |
| Whole blood | eQTL    | 0.15          | 0.05              | 0.25               | 0.0035   | 0.14    |          |
|             | control | -0.0015       | -0.044            | 0.042              | 0.95     | 0.098   | 0.044    |
| All         | prox    | 0.17          | 0.11              | 0.23               | 9.71E-09 | 0.16    | 0.69     |
|             | dist    | 0.089         | 0.036             | 0.14               | 0.00092  | 0.19    | 0.31     |
|             | eQTL    | 0.14          | 0.10              | 0.18               | 1.06E-11 | 0.17    | 3.24E-13 |

$\bar{\beta}$  is the mean effect size over the general linear model replicas with functional genetic affiliation covariates;  $p$  is the corresponding unadjusted p-value (see methods for more details);  $\pi_1$  is the estimated proportion of non-null associations;  $p_{MW}$  is the unadjusted Mann-Whitney test p-value for differences in association chi-squared between eQTL and respective matched control variants; prox stands for proximal eQTLs, dist for distal eQTLs.
