# Supplementary material for: Cross-tissue eQTL enrichment of associations in schizophrenia
Source: PubMed Central journal article supplement (PMC6126834; doi:10.1371/journal.pone.0202812), 2018-09-06
Supplement: pone.0202812.s016.pdf [file pone.0202812.s016.pdf]

**S5 Table** Schizophrenia association chi-squared general linear model coefficients for the four Roadmap functional affiliations.

| annotation      | $\beta$ | $\beta$ (95% low) | $\beta$ (95% high) | $p$      |
|-----------------|---------|-------------------|--------------------|----------|
| Strong_Enhancer | 0.039   | 0.022             | 0.055              | 3.58E-05 |
| Weak_Enhancer   | 0.032   | 0.02              | 0.045              | 6.24E-06 |
| Active_Promoter | 0.21    | 0.18              | 0.24               | 9.04E-38 |
| Weak_Promoter   | 0.13    | 0.11              | 0.16               | 2.31E-16 |
