# Supplementary material for: Cross-tissue eQTL enrichment of associations in schizophrenia
Source: PubMed Central journal article supplement (PMC6126834; doi:10.1371/journal.pone.0202812), 2018-09-06
Supplement: pone.0202812.s017.pdf [file pone.0202812.s017.pdf]

**S6 Table** Schizophrenia association chi-squared general linear model coefficients for the four Roadmap functional affiliations restricted to eQTLs and control variants.

| annotation      | $\beta$ | $\beta$ (95% low) | $\beta$ (95% high) | $p$     |
|-----------------|---------|-------------------|--------------------|---------|
| Strong_Enhancer | -0.024  | -0.073            | 0.025              | 0.40    |
| Weak_Enhancer   | 0.04    | 0.0011            | 0.08               | 0.071   |
| Active_Promoter | 0.099   | 0.052             | 0.15               | 0.00024 |
| Weak_Promoter   | 0.082   | 0.022             | 0.14               | 0.016   |
