# Supplementary material for: Cross-tissue eQTL enrichment of associations in schizophrenia
Source: PubMed Central journal article supplement (PMC6126834; doi:10.1371/journal.pone.0202812), 2018-09-06
Supplement: pone.0202812.s018.pdf [file pone.0202812.s018.pdf]

**S7 Table Schizophrenia association chi-squared general linear model coefficients for tissue-specific eQTLs with different functional affiliations.** The test statistics refer to the respective interaction terms. The interaction with TotLD represents the enrichment ascribable to the eQTLs irrespective of their LD-tagging power. Enhancer and Promoter affiliations were assigned by Roadmap in the corresponding tissues.

|                  | annotation      | $\beta$  | $\beta$ (95% low) | $\beta$ (95% high) | <i>p</i> |
|------------------|-----------------|----------|-------------------|--------------------|----------|
| Adipose eQTL     | TotLD           | 0.054    | 0.021             | 0.086              | 0.0037   |
|                  | Exon            | 0.049    | 0.017             | 0.082              | 0.0074   |
|                  | Intron          | 0.032    | -0.0022           | 0.067              | 0.10     |
|                  | X5UTR           | -0.018   | -0.048            | 0.012              | 0.30     |
|                  | X3UTR           | -0.031   | -0.066            | 0.0047             | 0.13     |
|                  | Active_Promoter | -0.26    | -0.47             | -0.042             | 0.036    |
|                  | Weak_Promoter   | -0.014   | -0.16             | 0.13               | 0.87     |
|                  | Strong_Enhancer | 0.05     | -0.082            | 0.18               | 0.51     |
|                  | Weak_Enhancer   | -0.044   | -0.21             | 0.12               | 0.65     |
| Epidermal eQTL   | TotLD           | 0.085    | 0.051             | 0.12               | 9.04E-06 |
|                  | Exon            | 0.053    | 0.023             | 0.084              | 0.0023   |
|                  | Intron          | 0.052    | 0.017             | 0.088              | 0.01     |
|                  | X5UTR           | 0.025    | -0.0096           | 0.059              | 0.21     |
|                  | X3UTR           | -0.017   | -0.05             | 0.015              | 0.34     |
|                  | Active_Promoter | -0.044   | -0.22             | 0.13               | 0.67     |
|                  | Weak_Promoter   | 0.17     | -0.0069           | 0.35               | 0.092    |
|                  | Strong_Enhancer | 0.0031   | -0.17             | 0.18               | 0.97     |
|                  | Weak_Enhancer   | -0.00035 | -0.19             | 0.19               | 1.00     |
| LCL eQTL         | TotLD           | 0.07     | 0.035             | 0.10               | 0.00042  |
|                  | Exon            | 0.017    | -0.013            | 0.047              | 0.32     |
|                  | Intron          | 0.035    | 0.0011            | 0.068              | 0.07     |
|                  | X5UTR           | -0.011   | -0.042            | 0.02               | 0.53     |
|                  | X3UTR           | 0.012    | -0.018            | 0.043              | 0.48     |
|                  | Active_Promoter | 0.081    | -0.062            | 0.22               | 0.32     |
|                  | Weak_Promoter   | -0.15    | -0.35             | 0.052              | 0.20     |
|                  | Strong_Enhancer | 0.03     | -0.11             | 0.17               | 0.72     |
|                  | Weak_Enhancer   | -0.028   | -0.18             | 0.12               | 0.74     |
| Whole blood eQTL | TotLD           | 0.087    | 0.04              | 0.13               | 0.0011   |
|                  | Exon            | 0.031    | -0.0077           | 0.07               | 0.16     |
|                  | Intron          | 0.12     | 0.07              | 0.16               | 1.19E-05 |
|                  | X5UTR           | 0.055    | 0.017             | 0.093              | 0.012    |
|                  | X3UTR           | -0.15    | -0.18             | -0.11              | 9.28E-12 |
|                  | Active_Promoter | 0.052    | -0.37             | 0.47               | 0.83     |
|                  | Weak_Promoter   | 0.12     | -0.067            | 0.31               | 0.26     |
|                  | Strong_Enhancer | 0.13     | -0.10             | 0.36               | 0.33     |
|                  | Weak_Enhancer   | -0.26    | -0.53             | 0.015              | 0.097    |
