# Supplementary material for: Cross-tissue eQTL enrichment of associations in schizophrenia
Source: PubMed Central journal article supplement (PMC6126834; doi:10.1371/journal.pone.0202812), 2018-09-06
Supplement: pone.0202812.s019.pdf [file pone.0202812.s019.pdf]

**S8 Table** Schizophrenia association chi-squared general linear model coefficients for all, proximal or distal eQTLs with different functional affiliations. The test statistics refer to the respective interaction terms. The interaction with TotLD represents the enrichment ascribable to the eQTLs irrespective of their LD-tagging power. Enhancer and Promoter affiliations were assigned by Roadmap in the corresponding tissues.

|                 | annotation      | $\beta$   | $\beta$ (95% low) | $\beta$ (95% high) | $p$      |
|-----------------|-----------------|-----------|-------------------|--------------------|----------|
| Proximal eQTL   | TotLD           | 0.21      | 0.17              | 0.24               | 6.81E-27 |
|                 | Exon            | 0.047     | 0.023             | 0.072              | 0.0007   |
|                 | Intron          | 0.14      | 0.11              | 0.18               | 2.71E-14 |
|                 | X5UTR           | 0.031     | 0.0059            | 0.056              | 0.031    |
|                 | X3UTR           | -4.59E-05 | -0.025            | 0.025              | 1.00     |
|                 | Active_Promoter | -0.015    | -0.12             | 0.095              | 0.81     |
|                 | Weak_Promoter   | 0.088     | -0.064            | 0.24               | 0.31     |
|                 | Strong_Enhancer | -0.062    | -0.20             | 0.071              | 0.41     |
|                 | Weak_Enhancer   | -2.62E-05 | -0.12             | 0.12               | 1.00     |
|                 | Distal eQTL     | TotLD     | -0.023            | -0.047             | 0.0011   |
| Exon            |                 | -0.009    | -0.034            | 0.016              | 0.53     |
| Intron          |                 | -0.018    | -0.042            | 0.007              | 0.21     |
| X5UTR           |                 | -0.041    | -0.068            | -0.014             | 0.0084   |
| X3UTR           |                 | -0.13     | -0.15             | -0.1               | 2.38E-16 |
| Active_Promoter |                 | 0.078     | -0.10             | 0.26               | 0.45     |
| Weak_Promoter   |                 | 0.034     | -0.19             | 0.26               | 0.79     |
| Strong_Enhancer |                 | 0.094     | -0.046            | 0.23               | 0.24     |
| Weak_Enhancer   |                 | -0.14     | -0.27             | -0.0082            | 0.062    |
| TotLD           |                 | 0.064     | 0.043             | 0.084              | 9.26E-08 |
| All eQTL        | Exon            | 0.028     | 0.008             | 0.047              | 0.014    |
|                 | Intron          | 0.046     | 0.025             | 0.067              | 0.00014  |
|                 | X5UTR           | 0.0037    | -0.017            | 0.024              | 0.76     |
|                 | X3UTR           | -0.059    | -0.079            | -0.038             | 3.55E-07 |
|                 | Active_Promoter | 0.0047    | -0.096            | 0.11               | 0.94     |
|                 | Weak_Promoter   | 0.083     | -0.052            | 0.22               | 0.28     |
|                 | Strong_Enhancer | 0.032     | -0.075            | 0.14               | 0.60     |
|                 | Weak_Enhancer   | -0.055    | -0.15             | 0.04               | 0.31     |
