# Supplementary material for: Cross-tissue eQTL enrichment of associations in schizophrenia
Source: PubMed Central journal article supplement (PMC6126834; doi:10.1371/journal.pone.0202812), 2018-09-06
Supplement: pone.0202812.s020.pdf [file pone.0202812.s020.pdf]

**S9 Table Schizophrenia association chi-squared general linear model coefficients for tissue-specific eQTLs with different functional affiliations upon exclusion of CommonMind and GTEx brain eQTLs.** The test statistics refer to the respective interaction terms. The interaction with TotLD represents the enrichment ascribable to the eQTLs irrespective of their LD-tagging power. Enhancer and Promoter affiliations were assigned by Roadmap in the corresponding tissues.

|                  | annotation      | $\beta$ | $\beta$ (95% low) | $\beta$ (95% high) | <i>p</i> |
|------------------|-----------------|---------|-------------------|--------------------|----------|
| Adipose eQTL     | TotLD           | 0.0073  | -0.028            | 0.042              | 0.72     |
|                  | Exon            | 0.025   | -0.012            | 0.062              | 0.23     |
|                  | Intron          | 0.008   | -0.029            | 0.045              | 0.71     |
|                  | X5UTR           | -0.017  | -0.055            | 0.02               | 0.42     |
|                  | X3UTR           | -0.06   | -0.10             | -0.02              | 0.0085   |
|                  | Active_Promoter | -0.10   | -0.36             | 0.16               | 0.50     |
|                  | Weak_Promoter   | -0.044  | -0.21             | 0.13               | 0.65     |
|                  | Strong_Enhancer | -0.017  | -0.16             | 0.13               | 0.83     |
|                  | Weak_Enhancer   | -0.15   | -0.33             | 0.026              | 0.13     |
| Epidermal eQTL   | TotLD           | 0.08    | 0.045             | 0.12               | 6.74E-05 |
|                  | Exon            | 0.049   | 0.018             | 0.081              | 0.0062   |
|                  | Intron          | 0.046   | 0.009             | 0.083              | 0.029    |
|                  | X5UTR           | 0.028   | -0.0065           | 0.063              | 0.15     |
|                  | X3UTR           | -0.029  | -0.062            | 0.0037             | 0.12     |
|                  | Active_Promoter | 0.045   | -0.15             | 0.24               | 0.68     |
|                  | Weak_Promoter   | 0.077   | -0.11             | 0.27               | 0.48     |
|                  | Strong_Enhancer | 0.033   | -0.14             | 0.21               | 0.74     |
|                  | Weak_Enhancer   | -0.019  | -0.21             | 0.17               | 0.86     |
| LCL eQTL         | TotLD           | 0.019   | -0.017            | 0.055              | 0.35     |
|                  | Exon            | -0.019  | -0.051            | 0.013              | 0.30     |
|                  | Intron          | 0.0027  | -0.032            | 0.037              | 0.89     |
|                  | X5UTR           | -0.038  | -0.071            | -0.0057            | 0.04     |
|                  | X3UTR           | -0.023  | -0.057            | 0.01               | 0.22     |
|                  | Active_Promoter | 0.056   | -0.10             | 0.21               | 0.53     |
|                  | Weak_Promoter   | -0.17   | -0.38             | 0.049              | 0.17     |
|                  | Strong_Enhancer | 0.024   | -0.13             | 0.17               | 0.78     |
|                  | Weak_Enhancer   | 0.004   | -0.15             | 0.16               | 0.96     |
| Whole blood eQTL | TotLD           | 0.072   | 0.018             | 0.12               | 0.018    |
|                  | Exon            | -0.014  | -0.058            | 0.03               | 0.59     |
|                  | Intron          | 0.096   | 0.044             | 0.15               | 0.0012   |
|                  | X5UTR           | 0.087   | 0.034             | 0.14               | 0.0039   |
|                  | X3UTR           | -0.14   | -0.18             | -0.093             | 1.98E-08 |
|                  | Active_Promoter | -0.0093 | -0.56             | 0.54               | 0.98     |
|                  | Weak_Promoter   | 0.16    | -0.07             | 0.39               | 0.22     |
|                  | Strong_Enhancer | 0.029   | -0.23             | 0.29               | 0.85     |
|                  | Weak_Enhancer   | -0.11   | -0.42             | 0.21               | 0.55     |
