# Supplementary material for: Cross-tissue eQTL enrichment of associations in schizophrenia
Source: PubMed Central journal article supplement (PMC6126834; doi:10.1371/journal.pone.0202812), 2018-09-06
Supplement: pone.0202812.s022.pdf [file pone.0202812.s022.pdf]

**S11 Table** Enrichment statistics and general linear model coefficients for squared BMI association z-scores differences between adipose tissue, epidermal tissue, lymphoblastoid cell lines (LCL) and whole blood eQTLs, and matching control variants.

| annotation  |         | $\bar{\beta}$ | $\beta$ (low 95%) | $\beta$ (high 95%) | $p$      | $\pi_1$ | $p_{MW}$ |
|-------------|---------|---------------|-------------------|--------------------|----------|---------|----------|
| Adipose     | eQTL    | 0.13          | 0.059             | 0.20               | 0.00032  | 0.22    | 2.38E-08 |
|             | control | -0.043        | -0.084            | -0.003             | 0.035    | 0.072   |          |
| Epidermal   | eQTL    | 0.12          | 0.049             | 0.18               | 0.00067  | 0.15    | 7.96E-07 |
|             | control | -0.041        | -0.084            | 0.0018             | 0.06     | 0.048   |          |
| LCL         | eQTL    | 0.12          | 0.05              | 0.18               | 0.00061  | 0.13    | 3.34E-09 |
|             | control | -0.093        | -0.14             | -0.051             | 1.45E-05 | 0.035   |          |
| Whole blood | eQTL    | 0.15          | -0.0049           | 0.30               | 0.058    | 0.093   | 1.72E-05 |
|             | control | -0.018        | -0.062            | 0.026              | 0.43     | 0.027   |          |
| All         | prox    | 0.095         | 0.044             | 0.15               | 0.00025  | 0.13    | 0.97     |
|             | dist    | 0.18          | 0.13              | 0.23               | 2.98E-13 | 0.17    | 0.034    |
|             | eQTL    | 0.17          | 0.13              | 0.20               | 1.20E-17 | 0.15    | 7.74E-24 |

$\bar{\beta}$  is the mean effect size over the general linear model replicas with functional genetic affiliation covariates;  $p$  is the corresponding unadjusted p-value (see methods for more details);  $\pi_1$  is the estimated proportion of non-null associations;  $p_{MW}$  is the unadjusted Mann-Whitney test p-value for differences in association chi-squared between eQTL and respective matched control variants; prox stands for proximal eQTLs, dist for distal eQTLs.
