# Supplementary material for: Cross-tissue eQTL enrichment of associations in schizophrenia
Source: PubMed Central journal article supplement (PMC6126834; doi:10.1371/journal.pone.0202812), 2018-09-06
Supplement: pone.0202812.s023.pdf [file pone.0202812.s023.pdf]

**S12 Table BMI association chi-squared general linear model coefficients for all eQTL types with the four Roadmap functional affiliations.** Enhancer and Promoter affiliations were assigned by Roadmap in the corresponding tissues.

|                  | annotation      | $\beta$  | $\beta$ (95% low) | $\beta$ (95% high) | <i>p</i> |
|------------------|-----------------|----------|-------------------|--------------------|----------|
|                  | Strong_Enhancer | 0.0061   | -0.093            | 0.11               | 0.91     |
|                  | Weak_Enhancer   | -0.072   | -0.16             | 0.013              | 0.14     |
|                  | Active_Promoter | 4.38E-05 | -0.11             | 0.11               | 1.00     |
|                  | Weak_Promoter   | -0.069   | -0.20             | 0.064              | 0.36     |
| Adipose eQTL     | Active_Promoter | -0.019   | -0.52             | 0.48               | 0.95     |
|                  | Weak_Promoter   | -0.072   | -0.38             | 0.24               | 0.68     |
|                  | Strong_Enhancer | 0.024    | -0.22             | 0.27               | 0.87     |
|                  | Weak_Enhancer   | -0.11    | -0.44             | 0.22               | 0.57     |
| Epidermal eQTL   | Active_Promoter | -0.17    | -0.59             | 0.25               | 0.49     |
|                  | Weak_Promoter   | 0.12     | -0.26             | 0.51               | 0.58     |
|                  | Strong_Enhancer | -0.0027  | -0.32             | 0.31               | 0.99     |
|                  | Weak_Enhancer   | 0.12     | -0.23             | 0.47               | 0.56     |
| LCL eQTL         | Active_Promoter | -0.0088  | -0.32             | 0.31               | 0.96     |
|                  | Weak_Promoter   | -0.25    | -0.67             | 0.17               | 0.30     |
|                  | Strong_Enhancer | -0.17    | -0.45             | 0.11               | 0.29     |
|                  | Weak_Enhancer   | -0.023   | -0.32             | 0.28               | 0.89     |
| Whole blood eQTL | Active_Promoter | -0.12    | -1.13             | 0.90               | 0.84     |
|                  | Weak_Promoter   | -0.026   | -0.42             | 0.37               | 0.91     |
|                  | Strong_Enhancer | -0.085   | -0.54             | 0.37               | 0.74     |
|                  | Weak_Enhancer   | 0.029    | -0.50             | 0.56               | 0.92     |
| Proximal eQTL    | Active_Promoter | -0.067   | -0.31             | 0.18               | 0.63     |
|                  | Weak_Promoter   | 0.17     | -0.15             | 0.50               | 0.35     |
|                  | Strong_Enhancer | -0.015   | -0.28             | 0.25               | 0.92     |
|                  | Weak_Enhancer   | 0.0041   | -0.25             | 0.26               | 0.98     |
| Distal eQTL      | Active_Promoter | 0.02     | -0.40             | 0.44               | 0.93     |
|                  | Weak_Promoter   | -0.44    | -0.93             | 0.058              | 0.12     |
|                  | Strong_Enhancer | 0.032    | -0.23             | 0.30               | 0.83     |
|                  | Weak_Enhancer   | -0.27    | -0.53             | -0.0027            | 0.077    |
| All eQTL         | Active_Promoter | -0.10    | -0.33             | 0.13               | 0.43     |
|                  | Weak_Promoter   | -0.038   | -0.33             | 0.26               | 0.82     |
|                  | Strong_Enhancer | -0.038   | -0.25             | 0.17               | 0.75     |
|                  | Weak_Enhancer   | -0.14    | -0.34             | 0.056              | 0.21     |
