# Supplementary material for: Cross-tissue eQTL enrichment of associations in schizophrenia
Source: PubMed Central journal article supplement (PMC6126834; doi:10.1371/journal.pone.0202812), 2018-09-06
Supplement: pone.0202812.s024.pdf [file pone.0202812.s024.pdf]

**S13 Table** Enrichment statistics and general linear model coefficients for squared Height association z-scores differences between adipose tissue, epidermal tissue, lymphoblastoid cell lines (LCL) and whole blood eQTLs, and matching control variants.

| annotation  |         | $\bar{\beta}$ | $\bar{\beta}$ (low 95%) | $\bar{\beta}$ (high 95%) | $p$      | $\pi_1$ | $p_{MW}$ |
|-------------|---------|---------------|-------------------------|--------------------------|----------|---------|----------|
| Adipose     | eQTL    | 0.19          | 0.055                   | 0.32                     | 0.0057   | 0.20    | 4.77E-08 |
|             | control | -0.093        | -0.15                   | -0.037                   | 0.0011   | 0.17    |          |
| Epidermal   | eQTL    | 0.16          | 0.056                   | 0.26                     | 0.0026   | 0.24    | 5.88E-08 |
|             | control | -0.058        | -0.11                   | -0.0024                  | 0.041    | 0.20    |          |
| LCL         | eQTL    | 0.30          | 0.18                    | 0.43                     | 3.19E-06 | 0.24    | 3.06E-16 |
|             | control | -0.18         | -0.24                   | -0.12                    | 1.51E-09 | 0.14    |          |
| Whole blood | eQTL    | 0.18          | 0.04                    | 0.33                     | 0.012    | 0.22    | 0.00032  |
|             | control | -0.0077       | -0.071                  | 0.055                    | 0.81     | 0.16    |          |
| All         | prox    | 0.24          | 0.17                    | 0.31                     | 1.04E-11 | 0.25    | 0.023    |
|             | dist    | 0.26          | 0.17                    | 0.34                     | 1.16E-08 | 0.21    | 0.98     |
|             | eQTL    | 0.28          | 0.22                    | 0.34                     | 4.26E-21 | 0.22    | 6.86E-29 |

$\bar{\beta}$  is the mean effect size over the general linear model replicas with functional genetic affiliation covariates;  $p$  is the corresponding unadjusted p-value (see methods for more details);  $\pi_1$  is the estimated proportion of non-null associations;  $p_{MW}$  is the unadjusted Mann-Whitney test p-value for differences in association chi-squared between eQTL and respective matched control variants; prox stands for proximal eQTLs, dist for distal eQTLs.
