# Supplementary material for: Cross-tissue eQTL enrichment of associations in schizophrenia
Source: PubMed Central journal article supplement (PMC6126834; doi:10.1371/journal.pone.0202812), 2018-09-06
Supplement: pone.0202812.s025.pdf [file pone.0202812.s025.pdf]

**S14 Table Height association chi-squared general linear model coefficients for all eQTL types with the four Roadmap functional affiliations.** Enhancer and Promoter affiliations were assigned by Roadmap in the corresponding tissues.

|                  | annotation      | $\beta$ | $\beta$ (95% low) | $\beta$ (95% high) | $p$    |
|------------------|-----------------|---------|-------------------|--------------------|--------|
|                  | Strong_Enhancer | 0.16    | 0.031             | 0.28               | 0.029  |
|                  | Weak_Enhancer   | 0.11    | 0.0051            | 0.22               | 0.066  |
|                  | Active_Promoter | 0.11    | -0.023            | 0.24               | 0.15   |
|                  | Weak_Promoter   | 0.1     | -0.066            | 0.27               | 0.29   |
| Adipose eQTL     | Active_Promoter | -0.18   | -0.81             | 0.45               | 0.62   |
|                  | Weak_Promoter   | -0.31   | -0.69             | 0.083              | 0.17   |
|                  | Strong_Enhancer | -0.23   | -0.54             | 0.084              | 0.20   |
|                  | Weak_Enhancer   | 0.19    | -0.22             | 0.60               | 0.42   |
|                  | Active_Promoter | 0.028   | -0.50             | 0.56               | 0.93   |
| Epidermal eQTL   | Weak_Promoter   | 0.21    | -0.27             | 0.70               | 0.44   |
|                  | Strong_Enhancer | 0.067   | -0.33             | 0.46               | 0.77   |
|                  | Weak_Enhancer   | 0.11    | -0.33             | 0.56               | 0.66   |
|                  | Active_Promoter | -0.33   | -0.72             | 0.068              | 0.15   |
|                  | Weak_Promoter   | 0.60    | 0.078             | 1.13               | 0.044  |
| LCL eQTL         | Strong_Enhancer | -0.36   | -0.71             | -0.01              | 0.071  |
|                  | Weak_Enhancer   | 0.042   | -0.34             | 0.42               | 0.85   |
|                  | Active_Promoter | -0.60   | -1.88             | 0.67               | 0.41   |
|                  | Weak_Promoter   | 0.25    | -0.24             | 0.75               | 0.37   |
|                  | Strong_Enhancer | -0.45   | -1.02             | 0.12               | 0.17   |
| Whole blood eQTL | Weak_Enhancer   | -0.29   | -0.95             | 0.37               | 0.44   |
|                  | Active_Promoter | -0.057  | -0.37             | 0.25               | 0.75   |
|                  | Weak_Promoter   | 0.64    | 0.23              | 1.05               | 0.0064 |
|                  | Strong_Enhancer | -0.075  | -0.40             | 0.25               | 0.69   |
|                  | Weak_Enhancer   | -0.22   | -0.54             | 0.092              | 0.21   |
| Proximal eQTL    | Active_Promoter | -0.39   | -0.92             | 0.13               | 0.19   |
|                  | Weak_Promoter   | -0.043  | -0.66             | 0.58               | 0.90   |
|                  | Strong_Enhancer | -0.069  | -0.40             | 0.27               | 0.72   |
|                  | Weak_Enhancer   | 0.36    | 0.022             | 0.69               | 0.061  |
|                  | Active_Promoter | -0.19   | -0.48             | 0.098              | 0.25   |
| Distal eQTL      | Weak_Promoter   | 0.43    | 0.059             | 0.80               | 0.042  |
|                  | Strong_Enhancer | -0.065  | -0.33             | 0.20               | 0.67   |
|                  | Weak_Enhancer   | 0.067   | -0.18             | 0.32               | 0.64   |
