# Supplementary material for: Cross-tissue eQTL enrichment of associations in schizophrenia
Source: PubMed Central journal article supplement (PMC6126834; doi:10.1371/journal.pone.0202812), 2018-09-06
Supplement: pone.0202812.s026.pdf [file pone.0202812.s026.pdf]

**S15 Table** Enrichment statistics and general linear model coefficients for squared RA association z-scores differences between adipose tissue, epidermal tissue, lymphoblastoid cell lines (LCL) and whole blood eQTLs, and matching control variants.

| annotation  |         | $\bar{\beta}$ | $\beta$ (low 95%) | $\beta$ (high 95%) | $p$      | $\pi_1$ | $p_{MW}$ |
|-------------|---------|---------------|-------------------|--------------------|----------|---------|----------|
| Adipose     | eQTL    | 0.34          | -0.0013           | 0.67               | 0.051    | 0.12    | 0.00011  |
|             | control | -0.087        | -0.20             | 0.029              | 0.14     | 0.012   |          |
| Epidermal   | eQTL    | 0.27          | -0.087            | 0.64               | 0.14     | 0.12    | 4.58E-05 |
|             | control | -0.14         | -0.25             | -0.023             | 0.018    | 0.058   |          |
| LCL         | eQTL    | 0.52          | 0.28              | 0.75               | 1.62E-05 | 0.099   | 3.11E-09 |
|             | control | -0.18         | -0.30             | -0.062             | 0.003    | 0.0094  |          |
| Whole blood | eQTL    | -0.11         | -0.38             | 0.15               | 0.40     | 0.14    | 0.045    |
|             | control | -0.047        | -0.17             | 0.079              | 0.46     | 0.096   |          |
| All         | prox    | 0.47          | 0.12              | 0.81               | 0.0085   | 0.096   | 0.90     |
|             | dist    | 0.18          | -0.086            | 0.44               | 0.19     | 0.13    | 0.10     |
|             | eQTL    | 0.37          | 0.26              | 0.47               | 4.78E-11 | 0.12    | 1.41E-14 |

$\bar{\beta}$  is the mean effect size over the general linear model replicas with functional genetic affiliation covariates;  $p$  is the corresponding unadjusted p-value (see methods for more details);  $\pi_1$  is the estimated proportion of non-null associations;  $p_{MW}$  is the unadjusted Mann-Whitney test p-value for differences in association chi-squared between eQTL and respective matched control variants; prox stands for proximal eQTLs, dist for distal eQTLs.
