# Supplementary material for: Cross-tissue eQTL enrichment of associations in schizophrenia
Source: PubMed Central journal article supplement (PMC6126834; doi:10.1371/journal.pone.0202812), 2018-09-06
Supplement: pone.0202812.s027.pdf [file pone.0202812.s027.pdf]

**S16 Table Rheumatoid arthritis association chi-squared general linear model coefficients for all eQTL types with the four Roadmap functional affiliations.** Enhancer and Promoter affiliations were assigned by Roadmap in the corresponding tissues.

|                  | annotation      | $\beta$ | $\beta$ (95% low) | $\beta$ (95% high) | $p$      |
|------------------|-----------------|---------|-------------------|--------------------|----------|
|                  | Strong_Enhancer | 1.02    | 0.85              | 1.18               | 2.22E-27 |
|                  | Weak_Enhancer   | 0.26    | 0.13              | 0.39               | 0.00058  |
|                  | Active_Promoter | 0.20    | 0.037             | 0.35               | 0.03     |
|                  | Weak_Promoter   | 0.0018  | -0.20             | 0.20               | 0.99     |
| Adipose eQTL     | Active_Promoter | 0.71    | -0.026            | 1.44               | 0.091    |
|                  | Weak_Promoter   | 0.034   | -0.46             | 0.53               | 0.90     |
|                  | Strong_Enhancer | 0.13    | -0.31             | 0.58               | 0.61     |
|                  | Weak_Enhancer   | -0.0087 | -0.57             | 0.56               | 0.98     |
| Epidermal eQTL   | Active_Promoter | 0.07    | -0.55             | 0.69               | 0.84     |
|                  | Weak_Promoter   | -0.70   | -1.32             | -0.085             | 0.046    |
|                  | Strong_Enhancer | -0.84   | -1.42             | -0.26              | 0.011    |
|                  | Weak_Enhancer   | -0.68   | -1.31             | -0.051             | 0.058    |
| LCL eQTL         | Active_Promoter | 0.019   | -0.47             | 0.51               | 0.95     |
|                  | Weak_Promoter   | 0.47    | -0.21             | 1.14               | 0.23     |
|                  | Strong_Enhancer | 1.34    | 0.85              | 1.83               | 1.67E-06 |
|                  | Weak_Enhancer   | -0.42   | -0.93             | 0.08               | 0.14     |
| Whole blood eQTL | Active_Promoter | 0.17    | -1.28             | 1.62               | 0.84     |
|                  | Weak_Promoter   | 0.013   | -0.63             | 0.65               | 0.97     |
|                  | Strong_Enhancer | -0.12   | -0.91             | 0.66               | 0.78     |
|                  | Weak_Enhancer   | -0.014  | -0.93             | 0.90               | 0.98     |
| Proximal eQTL    | Active_Promoter | 0.40    | 0.023             | 0.78               | 0.063    |
|                  | Weak_Promoter   | 0.20    | -0.32             | 0.72               | 0.49     |
|                  | Strong_Enhancer | 0.98    | 0.53              | 1.43               | 0.00012  |
|                  | Weak_Enhancer   | -0.19   | -0.60             | 0.22               | 0.41     |
| Distal eQTL      | Active_Promoter | -0.15   | -0.79             | 0.48               | 0.68     |
|                  | Weak_Promoter   | -0.43   | -1.22             | 0.36               | 0.34     |
|                  | Strong_Enhancer | 1.27    | 0.79              | 1.74               | 3.14E-06 |
|                  | Weak_Enhancer   | 0.73    | 0.28              | 1.18               | 0.0041   |
| All eQTL         | Active_Promoter | 0.25    | -0.099            | 0.60               | 0.21     |
|                  | Weak_Promoter   | 0.017   | -0.45             | 0.48               | 0.95     |
|                  | Strong_Enhancer | 1.40    | 1.04              | 1.76               | 1.37E-11 |
|                  | Weak_Enhancer   | 0.28    | -0.046            | 0.60               | 0.13     |
