# Supplementary material for: Cross-tissue eQTL enrichment of associations in schizophrenia
Source: PubMed Central journal article supplement (PMC6126834; doi:10.1371/journal.pone.0202812), 2018-09-06
Supplement: pone.0202812.s028.pdf [file pone.0202812.s028.pdf]

**S17 Table** Enrichment statistics and general linear model coefficients for squared SBP association z-scores differences between adipose tissue, epidermal tissue, lymphoblastoid cell lines (LCL) and whole blood eQTLs, and matching control variants.

| annotation  |         | $\bar{\beta}$ | $\beta$ (low 95%) | $\beta$ (high 95%) | $p$      | $\pi_1$ | $p_{MW}$ |
|-------------|---------|---------------|-------------------|--------------------|----------|---------|----------|
| Adipose     | eQTL    | 0.081         | -0.0023           | 0.16               | 0.057    | 0.11    | 0.00036  |
|             | control | -0.018        | -0.054            | 0.019              | 0.34     | 0.069   |          |
| Epidermal   | eQTL    | 0.06          | -0.0051           | 0.13               | 0.071    | 0.15    | 0.016    |
|             | control | -0.021        | -0.057            | 0.016              | 0.26     | 0.098   |          |
| LCL         | eQTL    | 0.038         | -0.019            | 0.094              | 0.19     | 0.06    | 0.049    |
|             | control | -0.031        | -0.069            | 0.0072             | 0.11     | 0.047   |          |
| Whole blood | eQTL    | 0.097         | 0.022             | 0.17               | 0.011    | 0.077   | 0.089    |
|             | control | -0.025        | -0.065            | 0.015              | 0.22     | 0.089   |          |
| All         | prox    | 0.072         | 0.026             | 0.12               | 0.0024   | 0.11    | 0.83     |
|             | dist    | 0.082         | 0.032             | 0.13               | 0.0013   | 0.10    | 0.17     |
|             | eQTL    | 0.085         | 0.05              | 0.12               | 1.53E-06 | 0.1     | 9.52E-06 |

$\bar{\beta}$  is the mean effect size over the general linear model replicas with functional genetic affiliation covariates;  $p$  is the corresponding unadjusted p-value (see methods for more details);  $\pi_1$  is the estimated proportion of non-null associations;  $p_{MW}$  is the unadjusted Mann-Whitney test p-value for differences in association chi-squared between eQTL and respective matched control variants; prox stands for proximal eQTLs, dist for distal eQTLs.
