# Supplementary material for: Cross-tissue eQTL enrichment of associations in schizophrenia
Source: PubMed Central journal article supplement (PMC6126834; doi:10.1371/journal.pone.0202812), 2018-09-06
Supplement: pone.0202812.s029.pdf [file pone.0202812.s029.pdf]

**S18 Table Systolic blood pressure association chi-squared general linear model coefficients for all eQTL types with the four Roadmap functional affiliations.** Enhancer and Promoter affiliations were assigned by Roadmap in the corresponding tissues.

|                  | annotation      | $\beta$ | $\beta$ (95% low) | $\beta$ (95% high) | <i>p</i> |
|------------------|-----------------|---------|-------------------|--------------------|----------|
|                  | Strong_Enhancer | 0.059   | -0.0058           | 0.12               | 0.11     |
|                  | Weak_Enhancer   | 0.019   | -0.036            | 0.075              | 0.54     |
|                  | Active_Promoter | -0.0011 | -0.073            | 0.07               | 0.98     |
|                  | Weak_Promoter   | -0.071  | -0.16             | 0.017              | 0.16     |
| Adipose eQTL     | Active_Promoter | -0.21   | -0.55             | 0.13               | 0.29     |
|                  | Weak_Promoter   | 0.00054 | -0.21             | 0.21               | 1.00     |
|                  | Strong_Enhancer | -0.035  | -0.20             | 0.13               | 0.70     |
|                  | Weak_Enhancer   | 0.27    | 0.059             | 0.48               | 0.025    |
| Epidermal eQTL   | Active_Promoter | -0.11   | -0.40             | 0.18               | 0.51     |
|                  | Weak_Promoter   | -0.18   | -0.43             | 0.079              | 0.23     |
|                  | Strong_Enhancer | 0.16    | -0.043            | 0.37               | 0.17     |
|                  | Weak_Enhancer   | 0.081   | -0.15             | 0.31               | 0.53     |
| LCL eQTL         | Active_Promoter | 0.17    | -0.045            | 0.38               | 0.17     |
|                  | Weak_Promoter   | -0.14   | -0.42             | 0.14               | 0.39     |
|                  | Strong_Enhancer | 0.067   | -0.11             | 0.25               | 0.52     |
|                  | Weak_Enhancer   | 0.029   | -0.17             | 0.23               | 0.80     |
| Whole blood eQTL | Active_Promoter | -0.38   | -1.08             | 0.33               | 0.35     |
|                  | Weak_Promoter   | -0.19   | -0.45             | 0.075              | 0.21     |
|                  | Strong_Enhancer | 0.16    | -0.13             | 0.46               | 0.34     |
|                  | Weak_Enhancer   | 0.032   | -0.31             | 0.37               | 0.87     |
| Proximal eQTL    | Active_Promoter | 0.016   | -0.15             | 0.18               | 0.87     |
|                  | Weak_Promoter   | -0.097  | -0.31             | 0.12               | 0.43     |
|                  | Strong_Enhancer | -0.011  | -0.18             | 0.16               | 0.91     |
|                  | Weak_Enhancer   | -0.077  | -0.24             | 0.089              | 0.42     |
| Distal eQTL      | Active_Promoter | -0.15   | -0.43             | 0.13               | 0.36     |
|                  | Weak_Promoter   | 0.074   | -0.25             | 0.40               | 0.69     |
|                  | Strong_Enhancer | -0.028  | -0.20             | 0.15               | 0.78     |
|                  | Weak_Enhancer   | 0.13    | -0.045            | 0.30               | 0.19     |
| All eQTL         | Active_Promoter | -0.011  | -0.17             | 0.14               | 0.90     |
|                  | Weak_Promoter   | -0.079  | -0.27             | 0.12               | 0.48     |
|                  | Strong_Enhancer | -0.021  | -0.16             | 0.12               | 0.79     |
|                  | Weak_Enhancer   | 0.027   | -0.10             | 0.16               | 0.72     |
