# Supplementary material for: Cross-tissue eQTL enrichment of associations in schizophrenia
Source: PubMed Central journal article supplement (PMC6126834; doi:10.1371/journal.pone.0202812), 2018-09-06
Supplement: pone.0202812.s030.pdf [file pone.0202812.s030.pdf]

**S19 Table** Enrichment statistics and general linear model coefficients for squared T2D association z-scores differences between adipose tissue, epidermal tissue, lymphoblastoid cell lines (LCL) and whole blood eQTLs, and matching control variants.

| annotation  |         | $\bar{\beta}$ | $\beta$ (low 95%) | $\beta$ (high 95%) | $p$     | $\pi_1$ | $p_{MW}$ |
|-------------|---------|---------------|-------------------|--------------------|---------|---------|----------|
| Adipose     | eQTL    | 0.13          | 0.054             | 0.20               | 0.00059 | 0.13    | 0.00049  |
|             | control | -0.043        | -0.082            | -0.005             | 0.027   | 0.017   |          |
| Epidermal   | eQTL    | -0.011        | -0.089            | 0.066              | 0.78    | 0.068   | 0.081    |
|             | control | -0.0019       | -0.067            | 0.063              | 0.95    | 0.048   |          |
| LCL         | eQTL    | 0.039         | -0.055            | 0.13               | 0.42    | 0.041   | 0.13     |
|             | control | -0.0043       | -0.044            | 0.036              | 0.83    | 0.035   |          |
| Whole blood | eQTL    | -0.0032       | -0.081            | 0.074              | 0.94    | 0       | 0.75     |
|             | control | -0.0024       | -0.05             | 0.045              | 0.92    | 0.098   |          |
| All         | prox    | 0.013         | -0.048            | 0.075              | 0.67    | 0.038   | 0.85     |
|             | dist    | 0.072         | 0.026             | 0.12               | 0.0023  | 0.082   | 0.15     |
|             | eQTL    | 0.055         | 0.0085            | 0.10               | 0.02    | 0.066   | 0.003    |

$\bar{\beta}$  is the mean effect size over the general linear model replicas with functional genetic affiliation covariates;  $p$  is the corresponding unadjusted p-value (see methods for more details);  $\pi_1$  is the estimated proportion of non-null associations;  $p_{MW}$  is the unadjusted Mann-Whitney test p-value for differences in association chi-squared between eQTL and respective matched control variants; prox stands for proximal eQTLs, dist for distal eQTLs.
