# Supplementary material for: Cross-tissue eQTL enrichment of associations in schizophrenia
Source: PubMed Central journal article supplement (PMC6126834; doi:10.1371/journal.pone.0202812), 2018-09-06
Supplement: pone.0202812.s031.pdf [file pone.0202812.s031.pdf]

**S20 Table** Type-II diabetes association chi-squared general linear model coefficients for all eQTL types with the four Roadmap functional affiliations. Enhancer and Promoter affiliations were assigned by Roadmap in the corresponding tissues.

|                  | annotation      | $\beta$  | $\beta$ (95% low) | $\beta$ (95% high) | <i>p</i> |
|------------------|-----------------|----------|-------------------|--------------------|----------|
|                  | Strong_Enhancer | -0.024   | -0.089            | 0.041              | 0.51     |
|                  | Weak_Enhancer   | -0.013   | -0.068            | 0.043              | 0.69     |
|                  | Active_Promoter | 0.0025   | -0.069            | 0.074              | 0.95     |
|                  | Weak_Promoter   | -0.00032 | -0.088            | 0.087              | 0.99     |
| Adipose eQTL     | Active_Promoter | -0.38    | -0.72             | -0.041             | 0.049    |
|                  | Weak_Promoter   | -0.12    | -0.32             | 0.091              | 0.32     |
|                  | Strong_Enhancer | 0.12     | -0.043            | 0.28               | 0.20     |
|                  | Weak_Enhancer   | 0.25     | 0.038             | 0.47               | 0.039    |
| Epidermal eQTL   | Active_Promoter | -0.19    | -0.48             | 0.10               | 0.25     |
|                  | Weak_Promoter   | -0.20    | -0.46             | 0.054              | 0.17     |
|                  | Strong_Enhancer | -0.035   | -0.24             | 0.17               | 0.77     |
|                  | Weak_Enhancer   | -0.045   | -0.28             | 0.18               | 0.73     |
| LCL eQTL         | Active_Promoter | -0.013   | -0.22             | 0.20               | 0.92     |
|                  | Weak_Promoter   | 0.062    | -0.22             | 0.34               | 0.70     |
|                  | Strong_Enhancer | -0.20    | -0.38             | -0.022             | 0.05     |
|                  | Weak_Enhancer   | 0.077    | -0.12             | 0.27               | 0.49     |
| Whole blood eQTL | Active_Promoter | -0.39    | -1.07             | 0.30               | 0.32     |
|                  | Weak_Promoter   | 0.13     | -0.13             | 0.40               | 0.37     |
|                  | Strong_Enhancer | -0.16    | -0.46             | 0.14               | 0.35     |
|                  | Weak_Enhancer   | 0.22     | -0.12             | 0.57               | 0.25     |
| Proximal eQTL    | Active_Promoter | -0.0085  | -0.18             | 0.16               | 0.93     |
|                  | Weak_Promoter   | -0.15    | -0.36             | 0.069              | 0.23     |
|                  | Strong_Enhancer | -0.049   | -0.22             | 0.12               | 0.62     |
|                  | Weak_Enhancer   | 0.019    | -0.15             | 0.18               | 0.84     |
| Distal eQTL      | Active_Promoter | -0.17    | -0.45             | 0.11               | 0.28     |
|                  | Weak_Promoter   | -0.12    | -0.45             | 0.20               | 0.51     |
|                  | Strong_Enhancer | -0.17    | -0.35             | 0.00087            | 0.081    |
|                  | Weak_Enhancer   | 0.11     | -0.068            | 0.28               | 0.29     |
| All eQTL         | Active_Promoter | -0.075   | -0.23             | 0.08               | 0.40     |
|                  | Weak_Promoter   | -0.17    | -0.37             | 0.022              | 0.12     |
|                  | Strong_Enhancer | -0.13    | -0.27             | 0.011              | 0.11     |
|                  | Weak_Enhancer   | 0.074    | -0.056            | 0.20               | 0.32     |
