# Supplementary material for: Cross-tissue eQTL enrichment of associations in schizophrenia
Source: PubMed Central journal article supplement (PMC6126834; doi:10.1371/journal.pone.0202812), 2018-09-06
Supplement: pone.0202812.s032.pdf [file pone.0202812.s032.pdf]

**S21 Table eQTLs and matched control variants census in the data set used.** The eQTLs and control variants from [1] were projected onto templates of ~2.5 million variants (~9 million variants for analyses involving brain eQTLs) with known pairwise LD.

| Tissue         | eQTL<br>2m (9m/Brain*) | Control<br>2m (9m) |
|----------------|------------------------|--------------------|
| Adipose        | 4193 (8334/564)        | 11389 (29385)      |
| Epidermal      | 4130 (8002/579)        | 11831 (30072)      |
| LCL            | 4441 (8623/480)        | 10172 (26604)      |
| Whole blood    | 2406 (4898/336)        | 9341 (20385)       |
| <b>All</b>     | 13624 (26866/1399)     | 40194 (101990)     |
| <b>Brain**</b> | (8992)                 | -                  |

\* GTEx [2] eQTLs

\*\* GTEx [2] and CommonMind [3] consensus set

1. Buil A, Viñuela A, Brown A, Davies M, Padioleau I, Bielser D, et al. Quantifying the degree of sharing of genetic and non-genetic causes of gene expression variability across four tissues. *bioRxiv*. 2016;doi:10.1101/053355.
2. GTEx Consortium. The Genotype-Tissue Expression (GTEx) pilot analysis: Multitissue gene regulation in humans. *Science*. 2015;348(6235):648–660. doi:10.1126/science.1262110.
3. Fromer M, Roussos P, Sieberts SK, Johnson JS, Kavanagh DH, Perumal TM, et al. Gene expression elucidates functional impact of polygenic risk for schizophrenia. *Nature Neuroscience*. 2016;.
