# Supplementary material for: Cross-tissue eQTL enrichment of associations in schizophrenia
Source: PubMed Central journal article supplement (PMC6126834; doi:10.1371/journal.pone.0202812), 2018-09-06
Supplement: pone.0202812.s033.pdf [file pone.0202812.s033.pdf]

**S22 Table eQTL demographics across the four Roadmap functional affiliations.** The numbers refer to the ~9 million template.

|             |         | Strong Enhancer | Weak Enhancer | Active Promoter | Weak Promoter |
|-------------|---------|-----------------|---------------|-----------------|---------------|
| Adipose     | eQTL    | 836             | 479           | 298             | 658           |
|             | Control | 1303            | 1401          | 457             | 1257          |
| Epidermal   | eQTL    | 454             | 376           | 430             | 414           |
|             | Control | 1071            | 1118          | 888             | 902           |
| LCL         | eQTL    | 698             | 629           | 704             | 341           |
|             | Control | 774             | 1562          | 838             | 588           |
| Whole blood | eQTL    | 246             | 174           | 75              | 384           |
|             | Control | 480             | 567           | 115             | 1076          |
| All         | eQTL    | 1507            | 1758          | 1726            | 874           |
|             | Control | 3436            | 6081          | 3685            | 2355          |
